# Supplementary material
Source: Research Square preprint supplement (doi:10.21203/rs.3.rs-9582930/v1)
Supplement: Supplementary file 1 [file a211d18e9ec028b51b1aedc8.xlsx]

## Sheet: Sheet1
pos_aa	ref_aa	alt_aa	count_1	count_2	count_3	total
56	N	S	112	178	154	444
56	N	D	109	92	115	316
56	N	I	53	85	66	204
56	N	Y	42	74	68	184
56	N	K	53	57	69	179
56	N	T	15	33	10	58
56	N	H	19	10	15	44
84	P	S	207	185	207	599
84	P	T	100	133	138	371
84	P	L	112	115	109	336
84	P	Q	36	61	59	156
84	P	R	32	13	9	54
84	P	A	9	14	20	43
210	L	Q	197	262	255	714
210	L	P	199	208	142	549
210	L	I	160	186	171	517
210	L	R	20	26	21	67
210	L	V	17	23	10	50
244	Y	C	169	191	125	485
244	Y	H	136	142	128	406
244	Y	N	51	59	60	170
244	Y	F	18	32	38	88
244	Y	D	9	18	3	30
244	Y	S	0	2	0	2
283	L	P	207	197	240	644
283	L	M	130	142	116	388
283	L	Q	112	133	138	383
283	L	R	35	24	52	111
283	L	V	11	9	7	27
