# Supplementary material
Source: Research Square preprint supplement (doi:10.21203/rs.3.rs-9582930/v1)
Supplement: Supplementary file 2 [file e5909b75c0a8f8a8281f28cd.xlsx]

## Sheet: Sheet1
Primer name	Direction	Sequence (5'→3')	Purpose
CMV-EcoRI-BoDV N	F	CTAGAGGATCTATTTCCGGTGAATTCGCCACCATGCCACCCAAGAGACGCCTGGTTGA	Error-prone PCR
CMV-XbaI-BoDV N	R	AGAATTGGATCCGCGGCCGCTCTAGACTAGTTTAGACCAGTCACACCTATCA	Error-prone PCR
CMV-EcoRI-N library	F	TACTAGAGGATCTATTTCCGGTGAATTC	NGS
CMV-XbaI-N library	R	AGAATTGGATCCGCGGCCGCTCTAGA	NGS
F: forward primer R: reverse primer
Restriction enzyme sites and vector-overlapping sequences are included in primer overhangs.
